# Supplementary material for: Topological and Multivalent Effects in Glycofullerene Oligomers as EBOLA Virus Inhibitors
Source: MDPI journal article supplement (doi:10.3390/ijms23095083), 2022-05-03
Supplement: s1 [file s1]

# Topological and multivalent effects in glycofullerene oligomers as Ebola virus inhibitors

Javier Ramos-Soriano <sup>1</sup>, Beatriz M. Illescas <sup>1,\*</sup>, Alfonso Pérez-Sánchez <sup>1</sup>, Raquel Sánchez-Bento <sup>1</sup>, Fátima Lasala <sup>2</sup>, Javier Rojo <sup>3,\*</sup>, Rafael Delgado <sup>2,\*</sup> and Nazario Martín <sup>1,4,\*</sup>

<sup>1</sup> Departamento de Química Orgánica, Facultad de Química, Universidad Complutense, 28040 Madrid, Spain

<sup>2</sup> Laboratorio de Microbiología Molecular, Instituto de Investigación Hospital 12 de Octubre (imas12) 28041 Madrid, Spain

<sup>3</sup> Glycosystems Laboratory, Instituto de Investigaciones Químicas (IIQ), CSIC – Universidad de Sevilla, Av. Américo Vespucio 49, Seville 41092 Spain

<sup>4</sup> IMDEA-Nanoscience, Campus Cantoblanco, 28049 Madrid, Spain

\* Correspondence: beti@ucm.es; javier.rojo@iiq.csic.es; rafael.delgado@salud.madrid.org; nazmar@ucm.es

## NMR Spectra of Compounds

### Compound 7

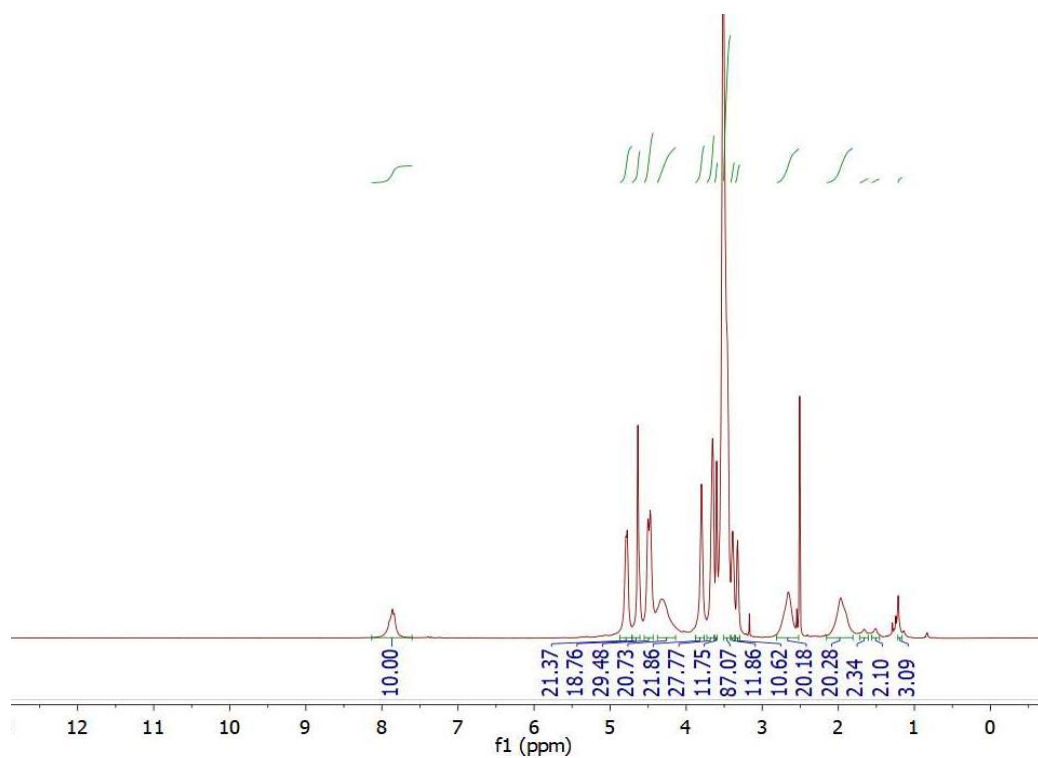

<sup>1</sup>H NMR spectrum of compound 7 (700 MHz, DMSO-*d*<sub>6</sub>)

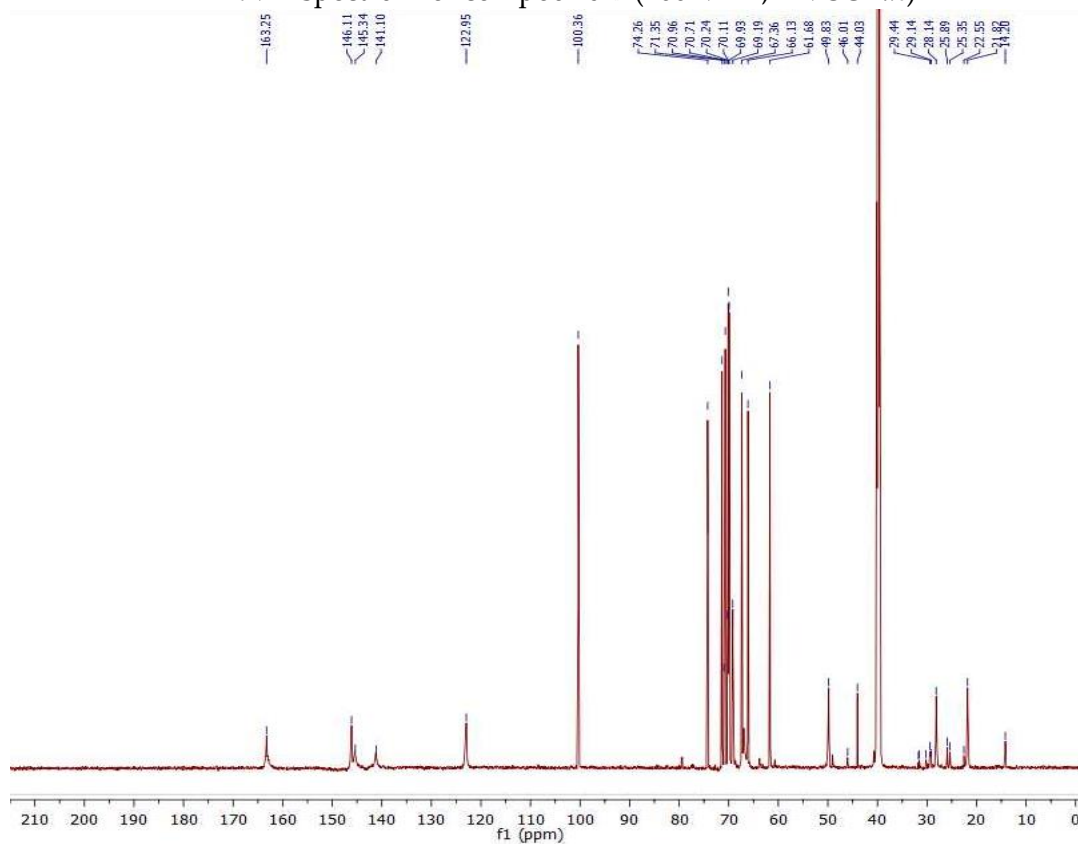

<sup>13</sup>C NMR spectrum of compound 7 (176 MHz, DMSO-*d*<sub>6</sub>)

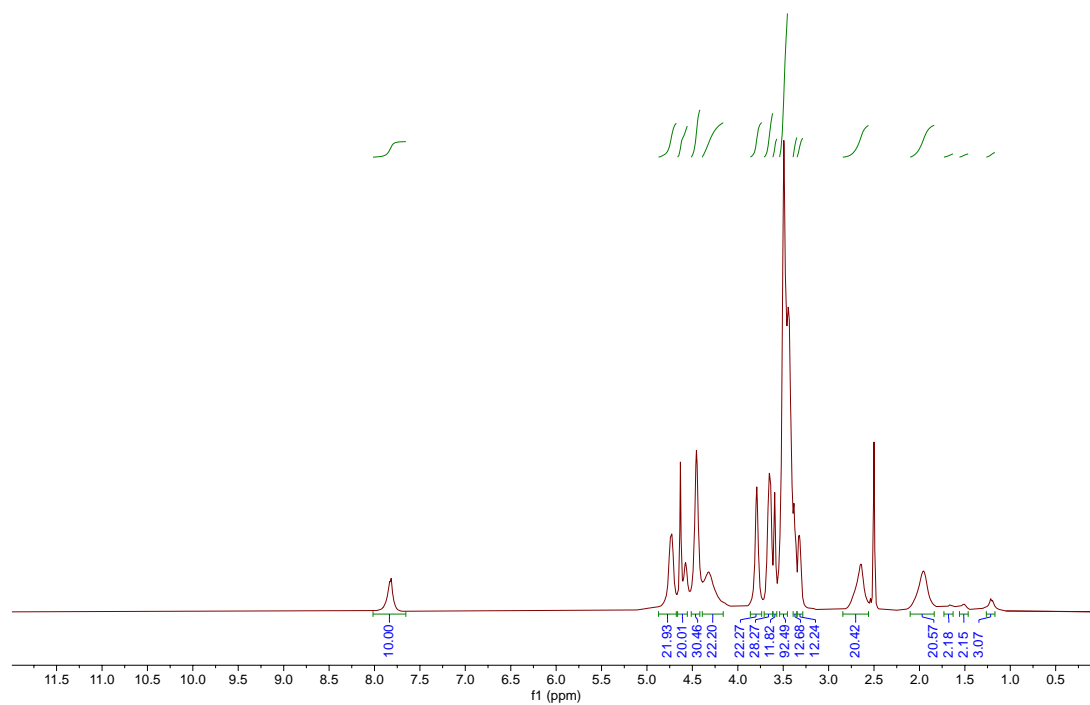

<sup>1</sup>H NMR spectrum of compound 8 (500 MHz, DMSO-*d*<sub>6</sub>)

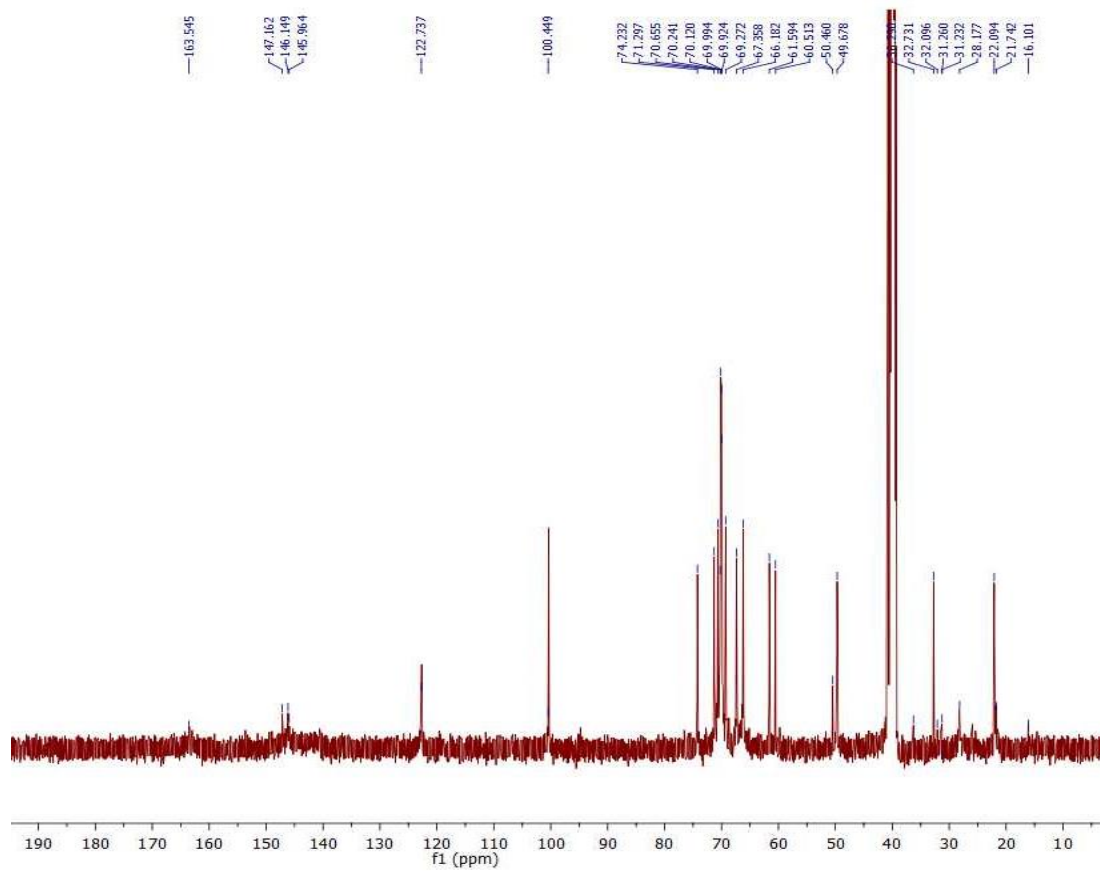

<sup>13</sup>C NMR spectrum of compound 8 (126 MHz, DMSO-*d*<sub>6</sub>)

# Compound 13

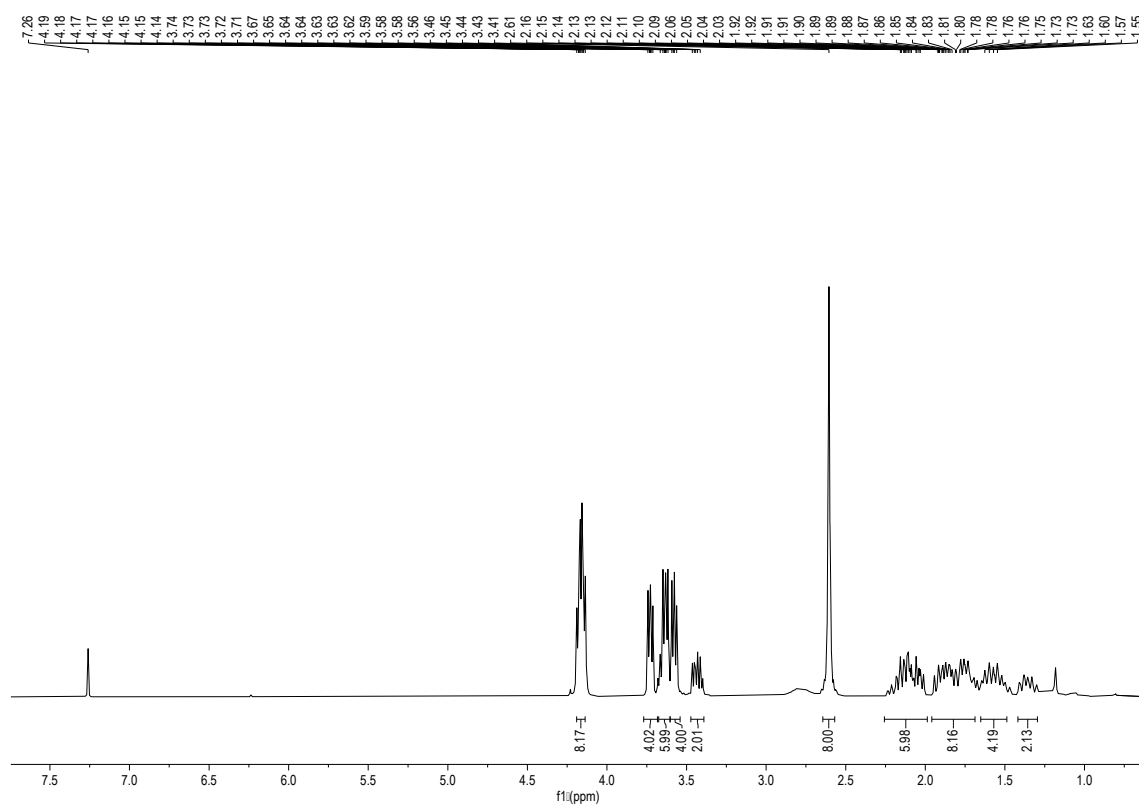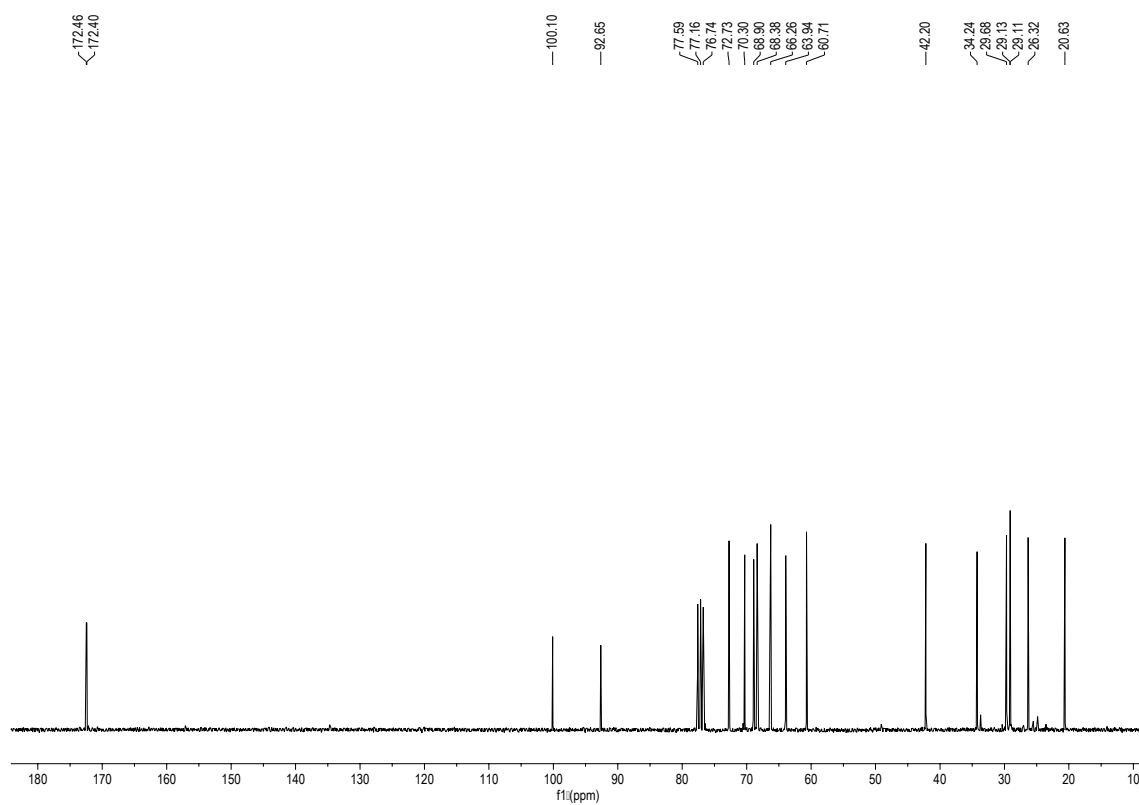

# Compound 14

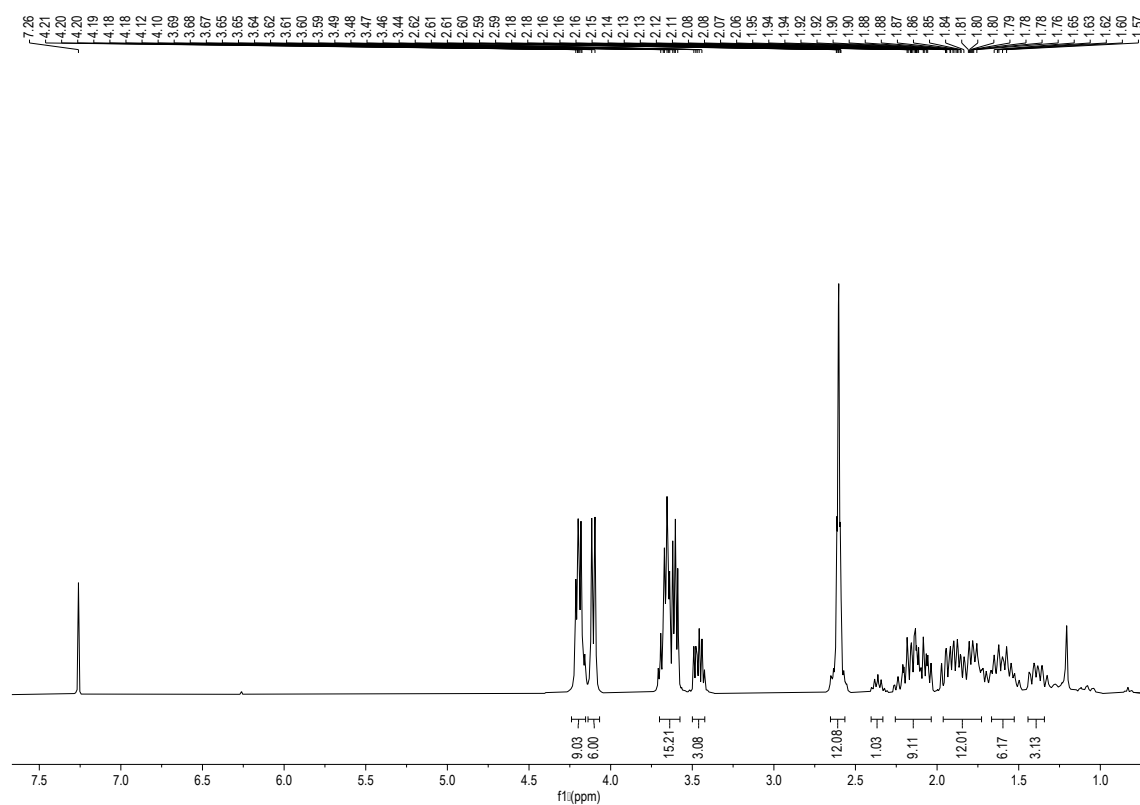

<sup>1</sup>H NMR spectrum of compound **14** (300 MHz, CDCl<sub>3</sub>)

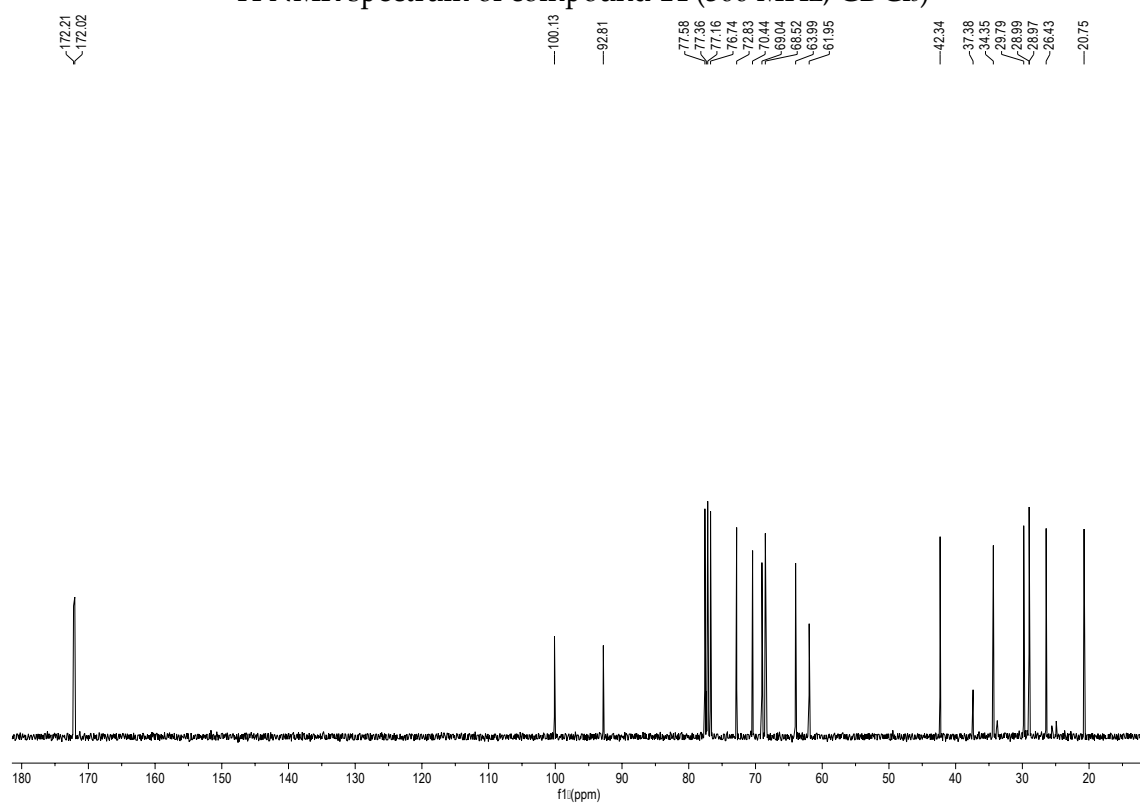

<sup>13</sup>C NMR spectrum of compound **14** (75 MHz, CDCl<sub>3</sub>)

# Compound 15

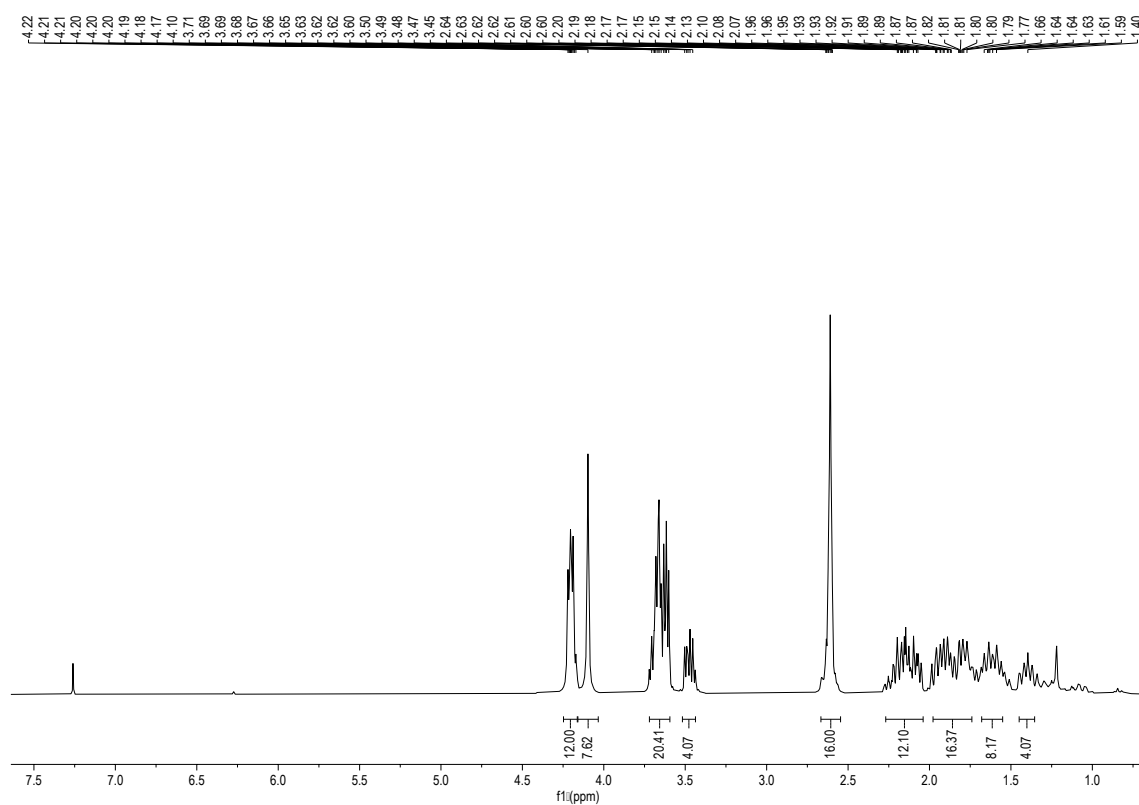

<sup>1</sup>H NMR spectrum of compound **15** (300 MHz, CDCl<sub>3</sub>)

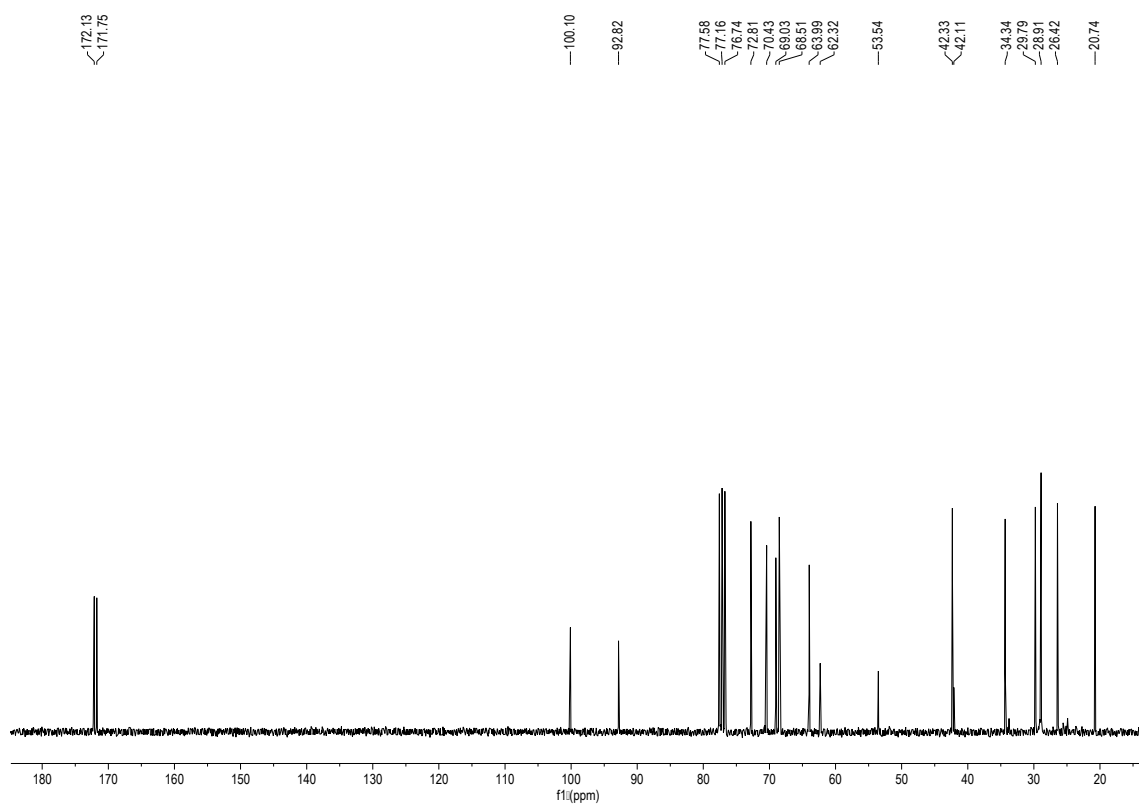

<sup>13</sup>C NMR spectrum of compound **15** (75 MHz, CDCl<sub>3</sub>)

# Compound 1

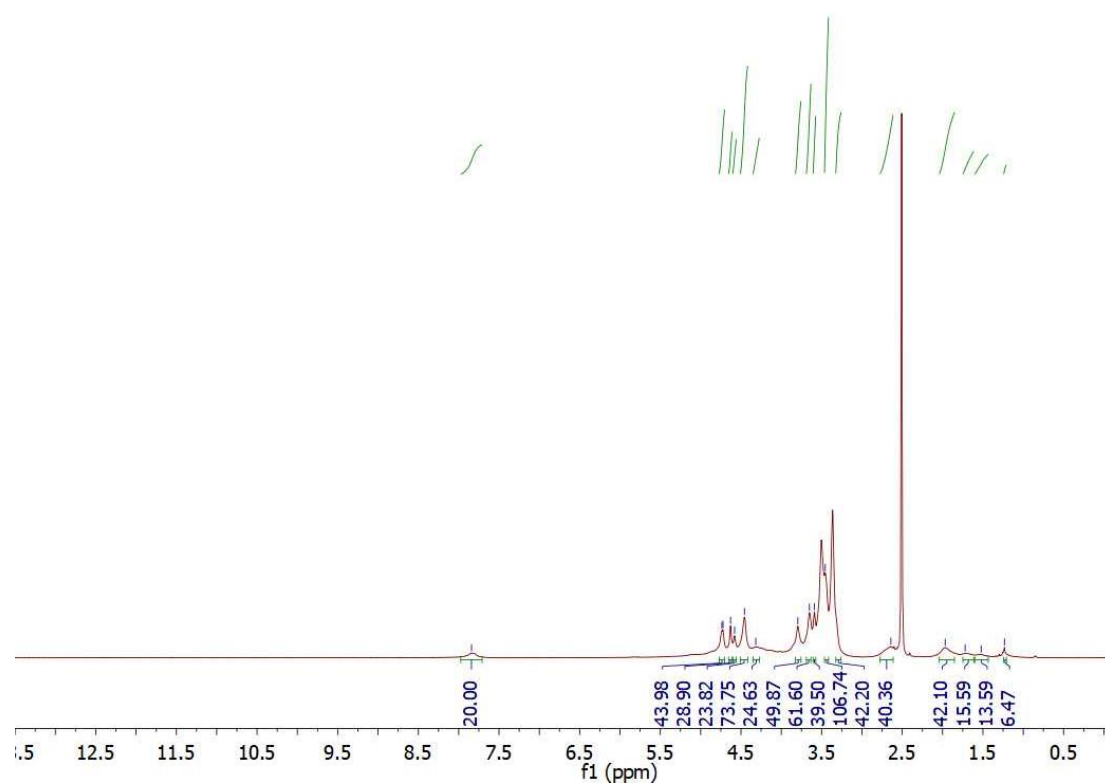

<sup>1</sup>H NMR spectrum of compound 1 (700 MHz, DMSO-*d*<sub>6</sub>)

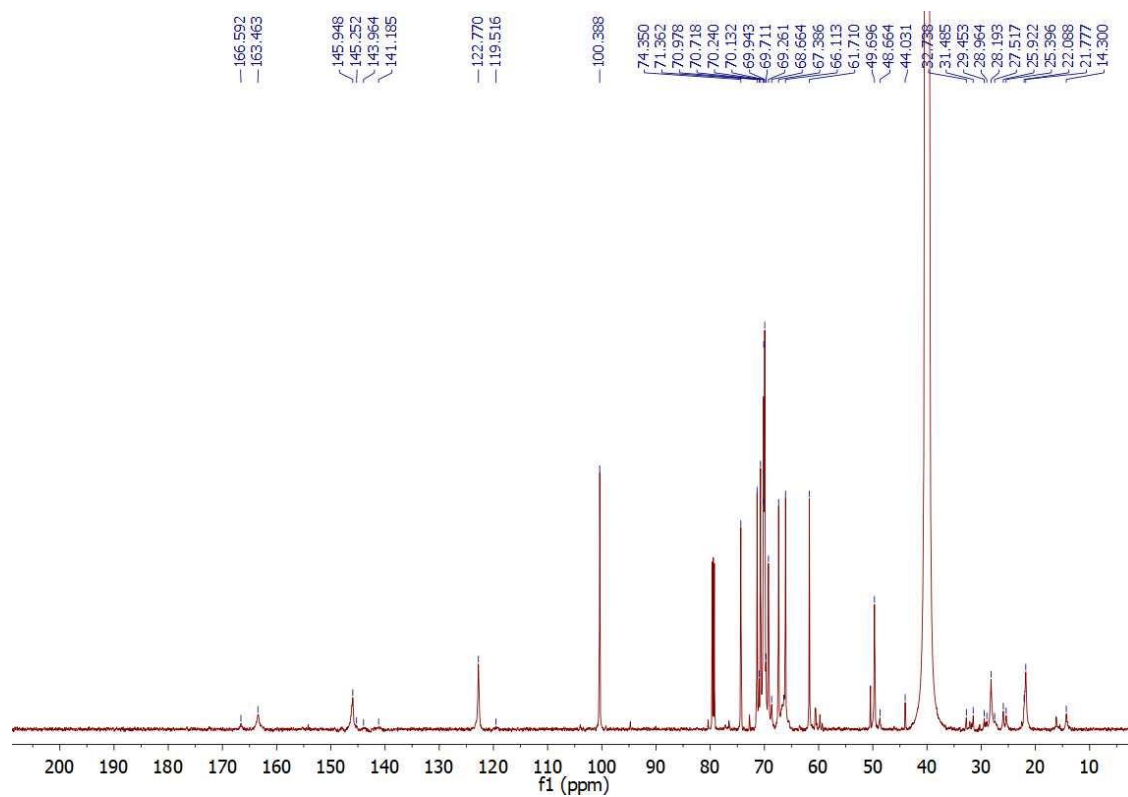

<sup>13</sup>C NMR spectrum of compound 1 (176 MHz, DMSO-*d*<sub>6</sub>)

## Compound 2

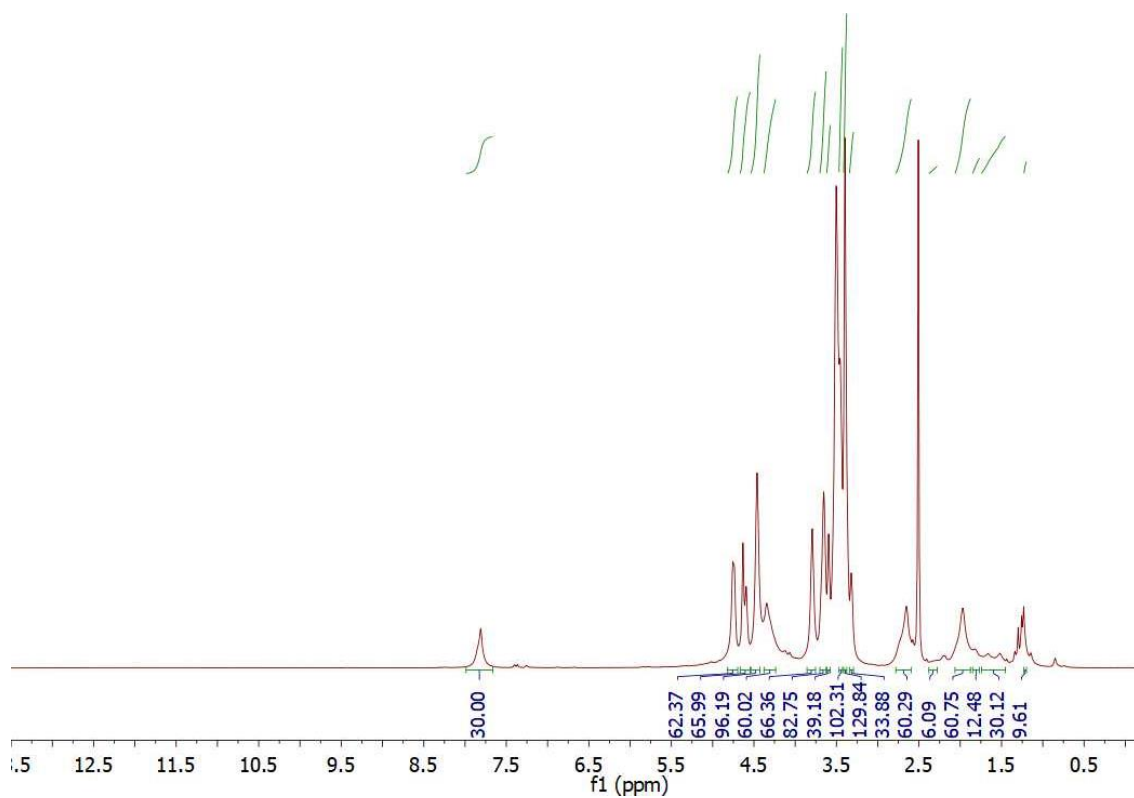

<sup>1</sup>H NMR spectrum of compound 2 (700 MHz, DMSO-*d*<sub>6</sub>)

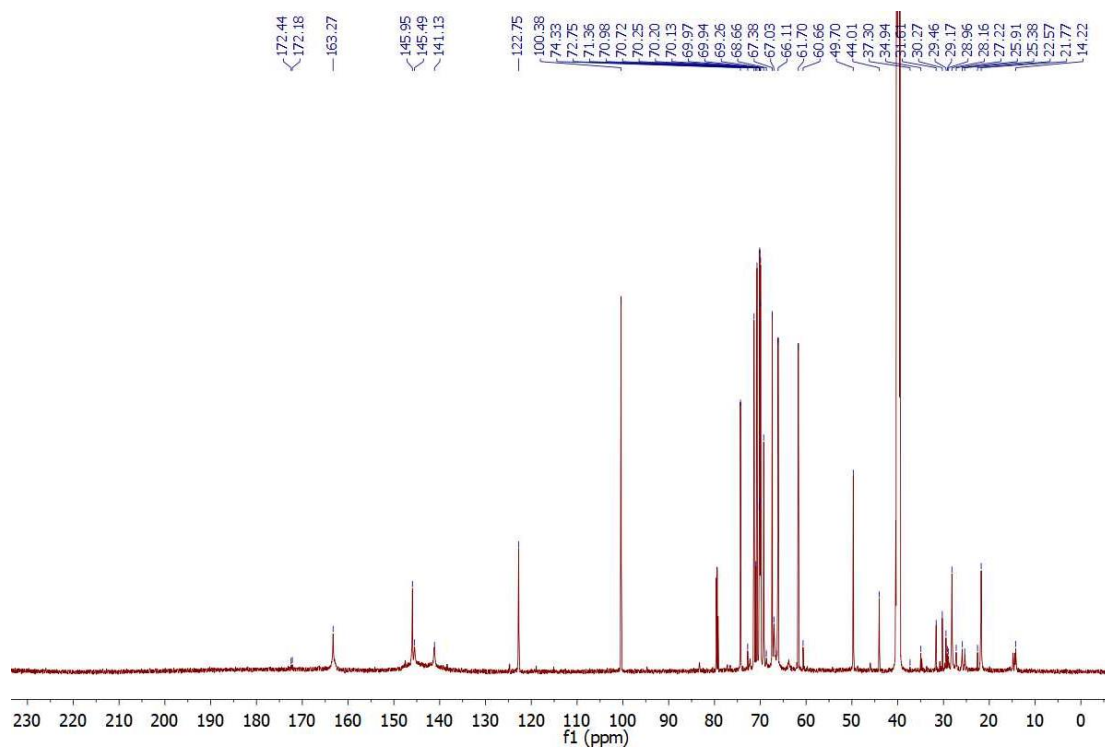

<sup>13</sup>C NMR spectrum of compound 2 (176 MHz, DMSO-*d*<sub>6</sub>)



# Compound 3

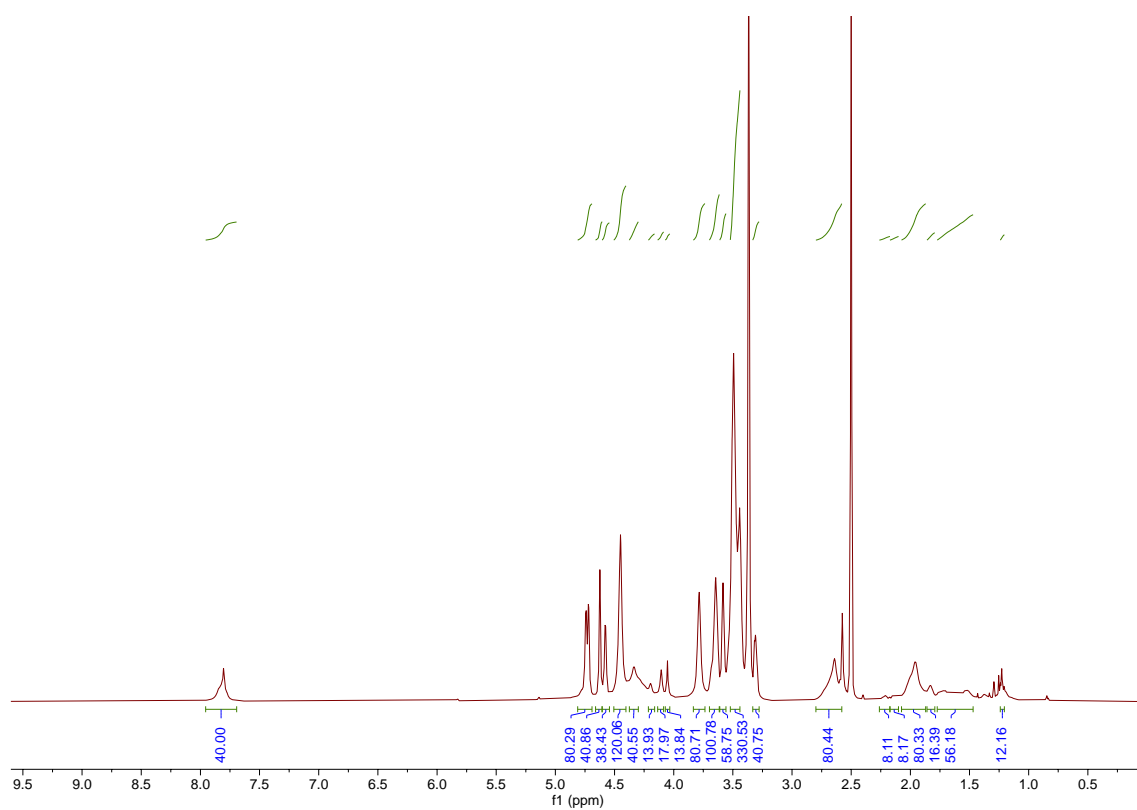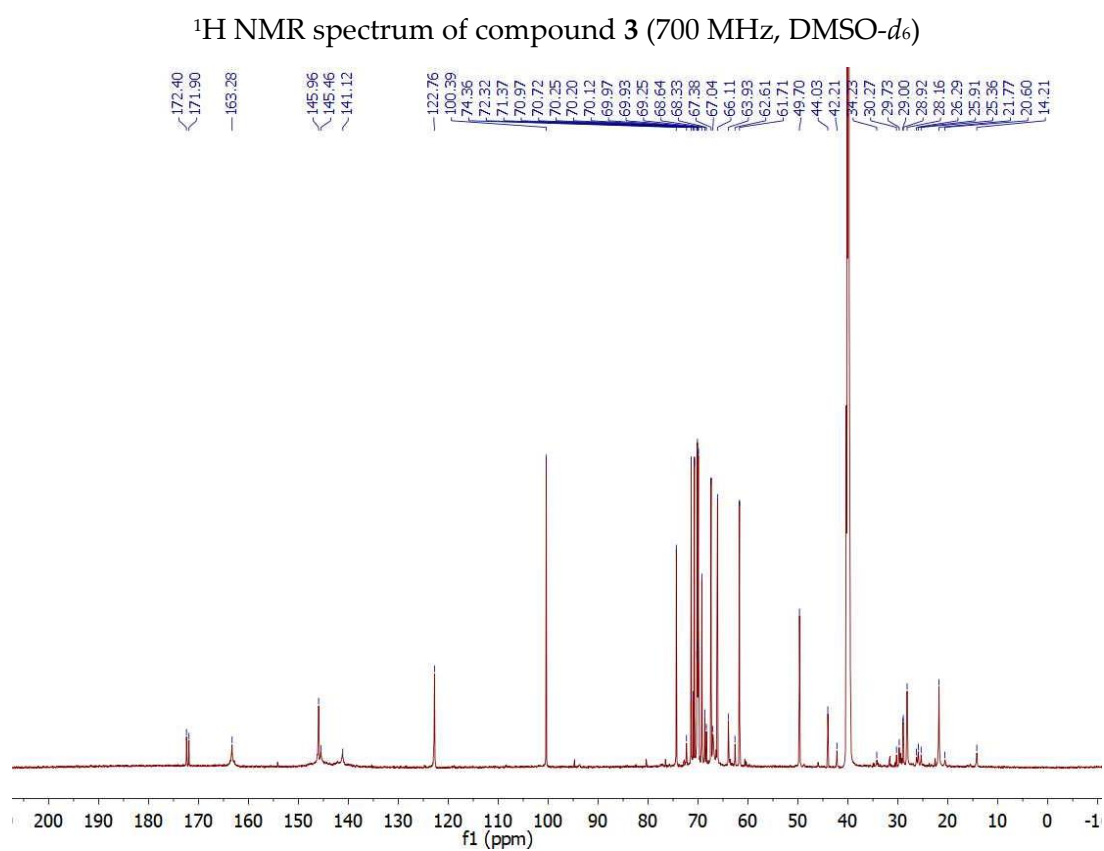

## Structures of Compounds in Table 1

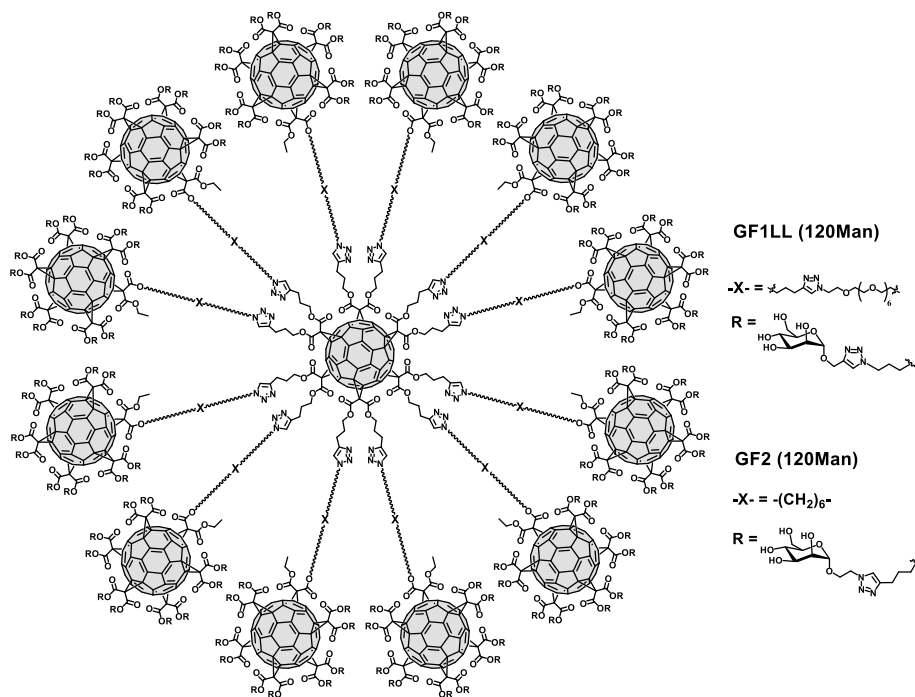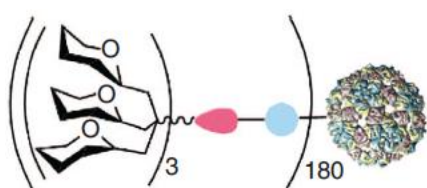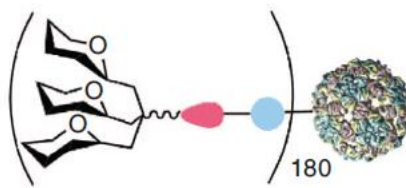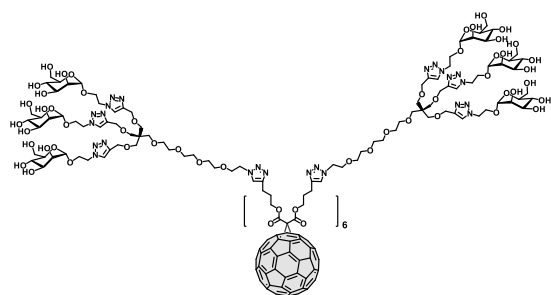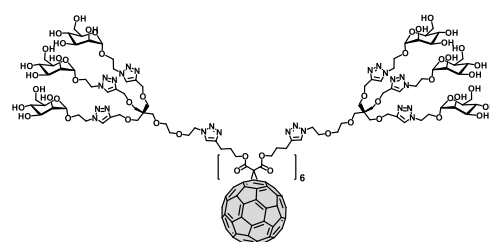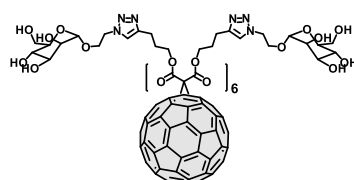

## Cytotoxicity assay

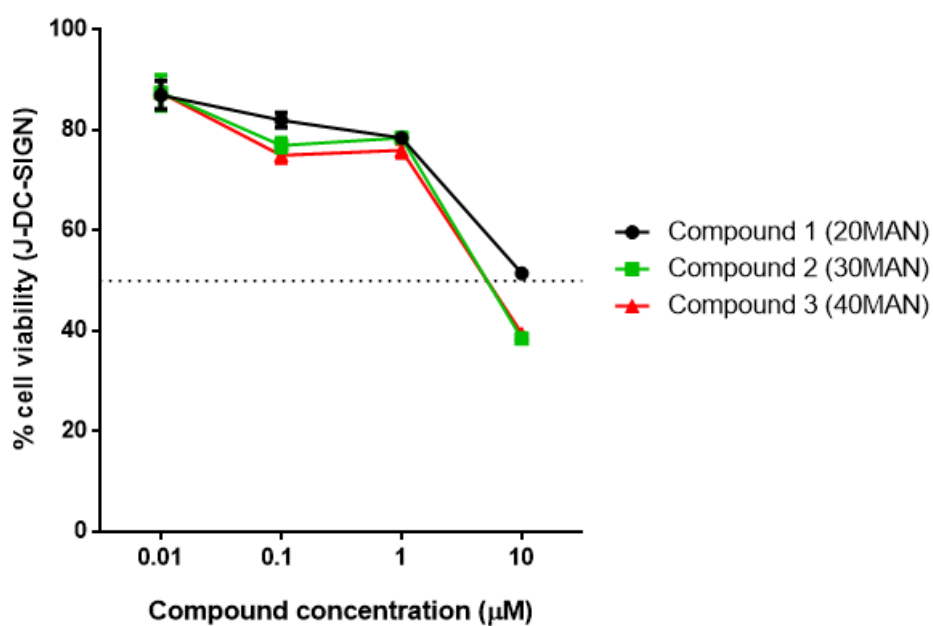

**Figure S1.** Cell proliferation assay using compounds **1** (20Man), **2** (30Man) and **3** (40Man). The cytotoxic effect of each compound was measured and presented as the percentage of viability of Jurkat DC-SIGN<sup>+</sup> after 48h culture in the presence of different concentrations of each compound. The symbols on the graph represent the mean  $\pm$  SEM.
